# Supplementary material
Source: PubMed Central journal article supplement (PMC3864011)
Supplement: NIHMS494453-supplement-2.pdf [file NIHMS494453-supplement-2.pdf]

## Supplemental Tables

**Table SI.** Hematocrit (Hct), platelet, white blood cell (WBCs) and polymorphonuclear leukocyte (PMNs) counts in untreated C57Bl/6J (WT), eNOS deficient (KO) and cross-transplanted chimeras.

| Group            | Hct (%)         | Platelets ( $10^3$ ) | WBCs ( $10^3$ )  | PMNs ( $10^3$ )             |
|------------------|-----------------|----------------------|------------------|-----------------------------|
| <b>Untreated</b> |                 |                      |                  |                             |
| WT               | 39.9 ± 0.8 n=9  | 1285 ± 91.9 n=8      | 38.0 ± 4.2 n=9   | 9.8 ± 0.9 n=9               |
| KO               | 40.1 ± 0.8 n=7  | 1541 ± 88.0 n=7      | 39.9 ± 4.3 n=7   | 10.4 ± 1.0 n=7              |
| BC+/EC+          | 43.9 ± 0.9 n=14 | 1665 ± 116.5 n=7     | 63.6 ± 7.2 n=10  | 16.1 ± 3.0 n=7              |
| BC-/EC+          | 40.2 ± 2.1 n=5  | 1181 ± 413.0 n=2     | 85.5 ± 3.0 n=3   | 25.1 ± 1.3 <sup>*</sup> n=3 |
| BC+/EC-          | 41.7 ± 1.2 n=12 | 1511 ± 69.0 n=13     | 49.4 ± 12.0 n=10 | 17.2 ± 3.3 n=10             |
| BC-/EC-          | 42.6 ± 0.8 n=11 | 1510 ± 102.1 n=9     | 56.0 ± 7.7 n=5   | 14.3 ± 1.9 n=5              |

Using One-way ANOVA and Bonferroni post-hoc test: <sup>\*</sup> denotes P < .05 vs WT.

**Table SII.** Platelet, white blood cell (WBCs) and polymorphonuclear leukocyte (PMNs) counts in BC+/EC- and BC-/EC- chimeras before and after platelet- (APS) or leukocyte-depleting (anti-CD45 Ab) treatment.

\* denotes P < 0.05 and \*\* denotes P < 0.0001 using one-way ANOVA and Bonferroni post-hoc test.

| Group               | Platelets ( $10^3$ ) |                | WBCs ( $10^3$ ) |              | PMNs ( $10^3$ ) |             |
|---------------------|----------------------|----------------|-----------------|--------------|-----------------|-------------|
|                     | Pre                  | Post           | Pre             | Post         | Pre             | Post        |
| <b>APS</b>          |                      |                |                 |              |                 |             |
| BC+/EC- (n=5)       | 1557 ± 62.8          | 128.0 ± 17.8** |                 | 20.2 ± 5.4   |                 | 9.8 ± 1.0   |
| BC-/EC- (n=8)       | 1571 ± 92.4          | 120.0 ± 18.1** |                 | 21.2 ± 5.9   |                 | 7.5 ± 0.6   |
| <b>Anti-CD45 Ab</b> |                      |                |                 |              |                 |             |
| BC+/EC- (n=3)       |                      |                | 61.7 ± 1.2      | 20.9 ± 8.1** | 21.5 ± 3.4      | 10.5 ± 7.1* |
| BC-/EC- (n=4)       |                      |                | 62.0 ± 6.3      | 10.9 ± 2.2** | 16.1 ± 0.8      | 3.6 ± 0.4*  |

Using One-way ANOVA and Bonferroni post-hoc test: <sup>\*</sup> denotes P < .05 and <sup>\*\*</sup> denotes P < .0001 vs pre-treatment.

**Table SIII.** Baseline systolic and diastolic blood pressures of cross-transplanted eNOS<sup>-/-</sup> chimeras during hours of daylight and darkness.

| Group                            | Systolic BP |         | Diastolic BP |         |
|----------------------------------|-------------|---------|--------------|---------|
|                                  | Day         | Night   | Day          | Night   |
|                                  | AUC (mmHg)  |         | AUC (mmHg)   |         |
| <b>BC+/EC+</b> (n=4)             | 1111        | 1263    | 825.3        | 974.4   |
| <b>BC-/EC+</b> (n=3)             | 1263        | 1317    | 1083         | 1130    |
| <b>BC+/EC-</b> (n=3)             | 1230        | 1415    | 962.1        | 1121    |
| <b>BC-/EC-</b> (n=4)             | 1325        | 1553    | 1051         | 1219    |
|                                  | p-value     |         | p-value      |         |
| <b>BC-/EC+</b> vs <b>BC+/EC+</b> | 0.0053*     | 0.2729  | 0.0006**     | 0.0160* |
| <b>BC+/EC-</b> vs <b>BC-/EC-</b> | 0.0494*     | 0.1488  | 0.0385*      | 0.1351  |
| <b>BC+/EC-</b> vs <b>BC-/EC+</b> | 0.6026      | 0.0010* | 0.0445*      | 0.7572  |

Day: 0600 to 1800 hours, Night: 1800 to 0600 hours. Group averages calculated for each 2 hour interval and area under the curve (AUC) by Two-way ANOVA with Bonferroni post-hoc test. \* denotes p<0.05 and \*\* denotes p<0.005.

## Supplemental Figure I

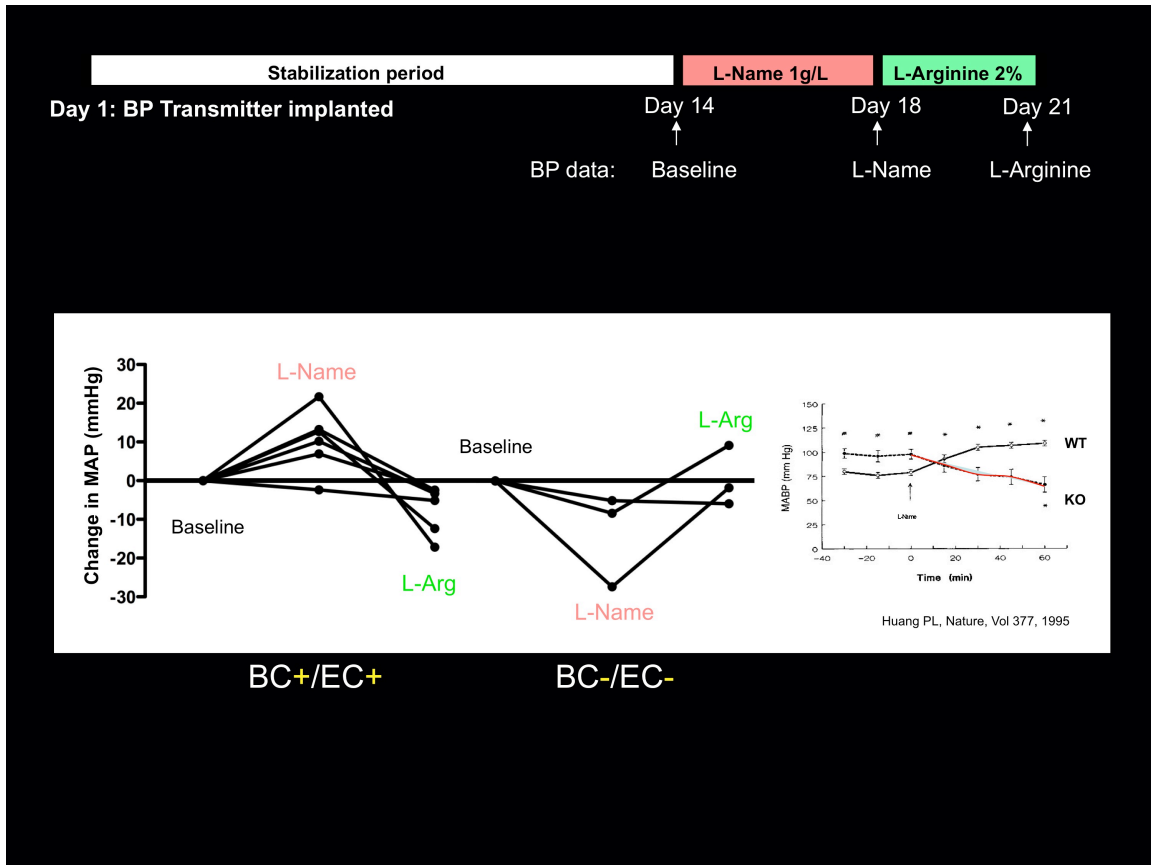

**Figure SI. Paradoxical response to L-NAME of BC-/EC- mice, similar to Harvard  $eNOS^{-/-}$  mice.** Harvard BC+/EC+ chimeras (n = 5) and BC-/EC- chimeras (n = 3) after oral treatment with L-NAME or L-Arg. Blood pressure data for individual animals shown as solid lines. Comparison of MAP responses to L-NAME treatment by WT and Harvard eNOS KO mice, as reported by Huang et al. (inset graph).<sup>13</sup>
